1 **Low level of knowledge about COVID-19 among a sample of Deaf persons in Ghana.**

2

3 Reginald Arthur-Mensah Jnr<sup>1¶\*</sup>, Jacob Nartey Quao<sup>2,3,4¶</sup>, Louisa Yeboah<sup>5&</sup>, Zanu Dassah<sup>6&</sup>,

4 Abigail Agartha Kyei<sup>1¶</sup>

5

6 <sup>1</sup>Department of Nursing and Midwifery, Faculty of Health and Allied Sciences, Pentecost

7 University, Accra, Ghana.

8 <sup>2</sup>Health Information Office, Ghana Health Service, Accra, Ghana.

9 <sup>3</sup>Sign Language Unit, Maamobi General Hospital, Accra, Ghana.

10 <sup>4</sup>Faculty of Education, Pentecost University, Accra, Ghana.

11 <sup>5</sup>Out Patient Department, Ga North Municipal Hospital, Accra, Ghana.

12 <sup>6</sup>Human Resource Health Directorate, Ghana Health Service, Accra, Ghana.

13

14 **\*Corresponding author:** Email: [ramensah@pentvars.edu.gh](mailto:ramensah@pentvars.edu.gh); [regartmen@gmail.com](mailto:regartmen@gmail.com) (RAM)

15

16 <sup>¶</sup>These authors contributed equally to this work.

17 <sup>&</sup>These authors also contributed equally to this work.

18

19

## 20 **Abstract**

21 Global observations have shown that the success or failure in preventing and controlling the  
22 spread of COVID-19 largely relies on human behaviours. Human behaviours in preventing and  
23 controlling the spread of the disease principally, is dependent on the level of knowledge of the  
24 disease, the attitudes adopted by persons due to the level of knowledge of the disease and the  
25 decision to adhere to the preventive practices (KAP) of the disease. Since the beginning of this  
26 pandemic, numerous studies have been conducted to investigate the KAP on the novel COVID-  
27 19 among diverse demographic groups. However, no reported studies have been found on the  
28 KAP of the COVID-19 pandemic among the deaf in various populations around the world.  
29 This study sought to assess the KAP of COVID-19 among deaf persons in the Greater Accra  
30 region of Ghana.

31 The design of this study utilized the knowledge, attitude and practice (KAP) survey.

32 Good attitude and adherence to the preventive practices of COVID-19 was observed among  
33 the deaf persons. However, knowledge about the science of the disease was lacking.

34 Educational campaigns about COVID-19 should also emphasize the teaching and  
35 understanding of the science of the virus and the disease to its audience.

36

37 **Keywords:** Attitude, Ayawaso North Municipality, COVID-19, Deaf persons, Ghana,  
38 Knowledge, Practice.

39

40

41

## 42 **Introduction**

43 The novel coronavirus disease 2019 (COVID-19) is the latest in the list of pandemics that is  
44 reforming every level of human survival. The pandemic is an infectious disease caused by the  
45 severe acute respiratory syndrome coronavirus 2 (SARS-CoV-2) virus [1]. The WHO declared  
46 the coronavirus disease outbreak a public health emergency of international concern on 30th  
47 January 2020, and a pandemic on 11th March 2020 [2].

48 Continuing studies have aligned the full-length genome sequence of SARS CoV-2 and other  
49 available genomes of beta coronaviruses. Results have shown that the closest relationship of  
50 SARS-CoV-2 is with the bat SARS-like coronavirus strain BatCov RaTG13, with an identity  
51 of 96%. These studies suggest that SARS-CoV-2 could be of bat origin, and SARS-CoV-2  
52 might be naturally evolved from bat coronavirus RaTG13 [3,4]. Furthermore, [5,6] also showed  
53 beta coronavirus isolated from pangolins has a sequence similarity of up to 99% with the  
54 currently infecting human strain, suggesting the potential for pangolins to be the intermediate  
55 host. SARS CoV-2 belongs to the subfamily *Coronavirinae* in the family of *Coronaviridae*.  
56 The genome of CoVs is a single-stranded positive-sense ribose nucleic acid (+ssRNA) [7].  
57 Generally, coronaviruses cause respiratory, digestive, and nervous system diseases in humans  
58 and many other animals [8].

59 The virus spreads through small liquid particles from an infected person's mouth or nose when  
60 they cough, sneeze, speak, sing or breathe out. These liquid particles range from large  
61 respiratory droplets to small aerosols [9].

62 Anyone can get infected with the virus and become ill at any time. However, most people  
63 infected with the virus will experience mild to moderate respiratory illness and recover without  
64 requiring special treatment. Others will become seriously ill and require medical attention.  
65 Older people and those with underlying medical conditions like cardiovascular disease,

66 diabetes, chronic respiratory disease, hypertension and cancer are more likely to develop  
67 serious illness [5,10,11,12].

68 Symptoms of the disease have been classified into three levels according to the severity of the  
69 disease; the less common symptoms, the most common symptoms and serious symptoms. The  
70 less common symptoms include experiencing sore throat, headaches, aches and pains,  
71 diarrhoea, noticing a rash on skin, or discoloration of fingers or toes red or irritated eyes. The  
72 most common symptoms include experiencing fever, tiredness, loss of taste or smell and having  
73 a dry cough. The serious symptoms include difficulty breathing or shortness of breath, loss of  
74 speech or mobility, or confusion and chest pains [13].

75 On average it takes 5 – 6 days from when someone is infected with the virus for symptoms to  
76 show up, however it can take up to 14 days for symptoms to show up. Important complications  
77 due to the infection include acute respiratory distress syndrome, sepsis, digestive stress, liver  
78 injury, hyperinflammatory response, multiorgan failure, thromboembolism and vascular  
79 damage [14,15].

80 All viruses, including SARS-CoV-2, mutate over time. Most changes have little to no impact  
81 on the virus' properties. However, some changes may affect the virus's properties, such as how  
82 easily it spreads, the associated disease severity, or the performance of vaccines, therapeutic  
83 medicines, diagnostic tools, or other public health and social measures [16]. The WHO, in  
84 collaboration with partners, expert networks, national authorities, specialist institutions and  
85 researchers have been monitoring and assessing the evolution of SARS-CoV-2 since January  
86 2020. During late 2020, the emergence of variants that posed an increased risk to global public  
87 health prompted the characterization of variants, namely, Variants of Concern (VOCs),  
88 Variants of Interest (VOIs) and Variants under Monitoring (VUM) in order to prioritize global  
89 monitoring and research, and ultimately to inform the ongoing response to the COVID-19  
90 pandemic.

91 VOC are case defined as variants that have been demonstrated to be associated with one or  
92 more of the following changes at a degree of global public health significance:

- 93 1. Increase in transmissibility or detrimental change in COVID-19 epidemiology; OR
- 94 2. Increase in virulence or change in clinical disease presentation; OR
- 95 3. Decrease in effectiveness of public health and social measures or available diagnostics,  
96 vaccines, therapeutics [16].

97 Currently circulating VOCs include the Delta and Omicron variant. Previously circulating  
98 VOCs include the Alpha, Beta and Gamma variants [16].

99 VOI are case defined as variants that have been demonstrated to be associated with one or more  
100 of the following changes at a degree of global public health significance:

- 101 1. Genetic changes that are predicted or known to affect virus characteristics such as  
102 transmissibility, disease severity, immune escape, diagnostic or therapeutic escape;
- 103 2. Identified to cause significant community transmission or multiple COVID-19 clusters,  
104 in multiple countries with increasing relative prevalence alongside increasing number  
105 of cases over time, or other apparent epidemiological impacts to suggest an emerging  
106 risk to global public health.

107 Circulating VOIs include Epsilon, Zeta, Eta, Theta, Iota, Kappa, Lambda and Mu [16].

108 VUMs are case defined as variant with genetic changes that are suspected to affect virus  
109 characteristics with some indication that it may pose a future risk, but evidence of phenotypic  
110 or epidemiological impact is currently unclear, requiring enhanced monitoring and repeat  
111 assessment pending new evidence. VUM include B.1.640 and XD [16].

112 Cardinal among the ways to prevent and control the infection is to be well informed about the  
113 disease and how the virus spreads. The following current precautionary measures are  
114 recommended according to public and social health standards;

- 115 1. Wearing properly face protection at all times e.g., properly fitting face mask

- 116 2. Practicing physical distancing (at least 1 meter apart) from others, even if they do not
- 117 appear sick
- 118 3. Practicing good respiratory hygiene by covering the mouth and nose with a cloth when
- 119 sneezing or coughing or sneezing or coughing in your flexed elbow in the absence of a
- 120 cloth
- 121 4. Choosing open, well-ventilated spaces over closed ones
- 122 5. Washing the hands regularly with soap under running water for at least 30 seconds
- 123 6. Cleaning the hands intermittently with an alcohol-based hand sanitizer
- 124 7. Getting vaccinated
- 125 8. Staying home or indoors if you are experiencing any of the symptoms [16].

126 Although vaccination against COVID-19 is ongoing, no specific treatment is available for  
127 COVID-19, although effective therapeutic approaches are in development [17,18]. Global  
128 observations have shown that the success or failure in preventing and controlling the spread of  
129 the disease largely relies on human behaviours. Human behaviours in preventing and  
130 controlling the spread of the disease principally, is dependent on the level of knowledge of the  
131 disease, the attitudes adopted by persons due to the level of knowledge of the disease and the  
132 decision to adhere to the preventive practices (KAP) of the disease. Since the beginning of this  
133 pandemic, numerous studies have been conducted to investigate the KAP on the novel COVID-  
134 19 among diverse demographic groups. These studies have allowed us to identify groups that  
135 have adequate or deficient knowledge to the disease, groups that have developed positive or  
136 negative attitudes to the disease and groups that are adhering to or otherwise to the preventive  
137 practices of the disease. However, no reported studies have been found on the KAP of the  
138 COVID-19 pandemic among the deaf in various populations around the world. Comprehensive  
139 understanding on the life cycle of SARS-CoV-2 and the interaction of the virus with hosts are  
140 necessarily important in the fight against the COVID-19 pandemic. As well, to facilitate

141 successful and effective management of the COVID-19 pandemic globally, all-inclusive  
142 awareness of the KAP of disease are fundamentally important. It is essential to understand  
143 individuals' knowledge, attitudes and adherence to practices toward COVID-19 since public  
144 adherence to health guidelines relies heavily on these facets. KAP of COVID-19 among all  
145 majority and minority demographic groups ought to be assessed. This study sought to assess  
146 the KAP of COVID-19 among a deaf community in the Greater Accra region of Ghana.

147

## 148 **Materials and Methods**

### 149 **Research design**

150 The design of this study utilized the knowledge, attitude and practice (KAP) survey. KAP  
151 surveys contain a set of questions segmented into knowledge, attitude and practices of a  
152 particular phenomenon of interest to receive responses to these questions. Responses to KAP  
153 surveys provides access to quantitative or qualitative information for the purpose of the KAP  
154 survey. Firstly, KAP surveys provides information about what is known, believed and done  
155 about phenomenon of interest among a target population. It then reveals misunderstandings,  
156 misconceptions and misbehaviors that signify hindrances to the phenomenon of interest. It  
157 further exposes aspects of the phenomenon of interest that are not yet known and practiced  
158 among a target population [19].

159 In the current study, the KAP survey will help us to measure the KAP of COVID-19 and to  
160 provide new tangents of the pandemic's reality among a deaf community in Ghana. The results  
161 from the survey will establish novel baseline information on the KAP of COVID-19 among the  
162 deaf community for use in future assessments. It will further help to justify the effectiveness  
163 or otherwise of the public health interventions against COVID-19 towards health-related  
164 behaviour change among the populace.

165

## 166 **Study area**

167 The Deaf community in the Ayawaso North Municipality were sampled for this study. The  
168 Ayawaso North Municipality is one of the 29 Metropolitan, Municipal and District Assemblies  
169 (MMDAs) in the Greater Accra region of Ghana. The topography of the area, climate,  
170 vegetation, housing structures, road networks, ethnic and cultural diversity, occupation of  
171 persons and religious affiliation is similar to any municipality of the Greater Accra Region.

172

## 173 **Study sample**

174 Deaf persons in the Ayawaso North Municipality were sampled for the study. They included  
175 both male and female deaf persons above the age of ten years who could communicate the  
176 American/Ghanaian Sign Language (A/GSL).

177

## 178 **Sample size and sampling procedure**

179 The census method of sampling was used to include all deaf persons at the Ayawaso North  
180 Municipality into the study. Census sampling is a statistical method of sampling that studies  
181 all the members of a population in a research study. Results obtained from census samples are  
182 unabridged, useful and directly prognostic [20]. In all, 144 deaf persons were sampled in the  
183 current study.

184

## 185 **Data collection instrument**

186 The KAP COVID-19 instrument developed by [21] was adapted for this study. Our KAP  
187 COVID-19 questionnaire consisted of 12 question items on knowledge, 6 question items on  
188 attitudes and 9 question items on adherence to preventive practices of COVID-19. Responses



189 were measured on a numeric rating scale. Question items on knowledge were rated as I do not  
190 know = 0 and Yes = 1. Question items on attitudes were rated as No = 0, I am not sure = 1 and  
191 Yes = 2. Question items on adherence to preventive practices of COVID-19 were rated as  
192 Never = 0, Sometimes = 1, Often = 2 and Always = 3. The psychometric properties, validity  
193 and reliability of the KAP COVID-19 questionnaire have been reported [21].

194

## 195 **Data collection procedure**

196 Data collection was scheduled during the second round of the National COVID-19 mass  
197 vaccination at the Municipality. These second round of vaccinations was to help achieve herd  
198 immunity against the virus in the country. A cubicle for our data collection was setup alongside  
199 the National COVID-19 mass vaccination team setup during the second round of vaccination.  
200 As deaf persons came to the center to be registered for the vaccination, we collected our data  
201 before they received the jab. In the cubicle, they were warmly welcomed, given a seat and  
202 served with water. The purpose of the study was then thoroughly explained to deaf persons.  
203 Afterwards, they were given opportunity to ask questions and seek clarification on any issue  
204 relating to the study. Those who agreed to take part in the study, signed or thumb printed the  
205 consent forms before data was collected. Some questionnaires were self-administered whilst  
206 others were completed with the help of the researchers.

207 Notably, data was collected by researchers who were familiar with the deaf culture, thus, all  
208 values peculiar to the deaf culture were observed. All communication was done using the  
209 A/GSL. Additionally, COVID-19 protocols were observed between the researchers and the  
210 deaf persons during the period of data collection. After data collection, deaf persons proceeded  
211 to take their second jab of COVID-19 vaccine. Data was collected from April 19th to 30th,  
212 2022.

213

## 214 **Ethical considerations**

215 Ethical approval to conduct this study was given by the Ghana Health Service (GHS)  
216 Institutional Review Board (IRB) after the study protocol was reviewed. Additionally,  
217 permission to conduct the study among the deaf persons in the municipality was given by the  
218 Municipal Health Director, the Municipal Public Health Nurse, the Municipal Disease Control  
219 Officer, the Municipal Health Promotion Officer, the Municipal Health Information Officer,  
220 the Municipal Chief Director, the Municipal Social Welfare Director and the head of the Ghana  
221 National Association of the Deaf representatives in the district. Study details were thoroughly  
222 explained to our sample before data collection. Our sample were given opportunity to ask  
223 questions and seek clarification on any issue relating to the study before data collection. This  
224 was done to prevent issues of dishonesty. Those who agreed to take part in the study signed or  
225 thumb printed the consent forms before data was collected. Some questionnaires were self-  
226 administered whilst others were completed with the help of the researchers. Additionally, the  
227 methods for the study ensured that there was no harm in any way to the sample during data  
228 collection and they were assured of confidentiality. They were also informed of the voluntary  
229 nature of the study participation or withdrawal without any negative consequences. The study  
230 also ensured that privacy of the sample was respected and no act compromised their privacy.  
231 For deaf persons who were under 18 years, written informed consent was obtained from either  
232 of their parents/guardians before data collection. They were also taken through the ethical  
233 procedures outlined above.

234

## 235 **Data analysis**

236 Data analysis was performed using IBM® SPSS software version 23.0 (SPSS Inc, Chicago,  
237 IL, USA). Firstly, frequencies and percentages were used to present the demographic details of  
238 our sample. Secondly, frequencies and percentages were used to present the responses to the

239 knowledge and attitude subscales. Average scores using modal values were used to present the  
240 results of the adherence to the preventive practices of COVID-19 subscale.

241

## 242 **Results**

### 243 **Demographic details of Deaf persons**

244 A total of 144 deaf persons were sampled in the study. This number reflected all deaf persons  
245 who had registered with the Municipal Directorate. They comprised 68/144 (47.2%) males and  
246 76/144 (52.8%) females. Their mean age was 36 years ( $\pm 12.84$ ). The range of their ages was  
247 from 12 years to 65 years. Regarding their educational attainment, the majority, 48/144 (33.3)  
248 attained up to Junior High School level of education. 28/144 (19.4%) had no formal education.  
249 About a quarter of the deaf persons, 26/144 (18.1%) had attained up to the Basic level and the  
250 Senior High School level of education and 16/144 (11.1%) had attained up to the tertiary level  
251 of education. The bulk, 64/144 (44.4%) of the deaf persons were unemployed, 40/144 (27.8%)  
252 were doing their own businesses, 24/144 (16.7%) were working at various private sector  
253 businesses and 16/144 (11.1%) were Government workers. 116/144 (80.6%) of deaf persons  
254 were unmarried and the rest, 28/144 (19.4%) were married (Table 1).

255

256

257

258

259

260

261

262

263

264 **Table 1: Demographic details of Deaf persons**

| <b>Demographic details</b> | <b><i>f</i>(%)</b> |
|----------------------------|--------------------|
| <b>Gender</b>              |                    |
| Males                      | 68 (47.2)          |
| Females                    | 76 (52.8)          |
| <b>Total</b>               | 144 (100)          |
| <b>Educational level</b>   |                    |
| No formal education        | 28 (19.4)          |
| Primary                    | 26 (18.1)          |
| Junior High School         | 48 (33.3)          |
| Senior High School         | 26 (18.1)          |
| Tertiary                   | 16 (11.1)          |
| <b>Total</b>               | 144 (100)          |
| <b>Occupation</b>          |                    |
| Unemployed                 | 64 (44.4)          |
| Government worker          | 16 (11.1)          |
| Private business employee  | 24 (16.7)          |
| Doing own business         | 40 (27.8)          |
| <b>Total</b>               | 144 (100)          |
| <b>Marital status</b>      |                    |
| Married                    | 28 (19.4)          |
| Unmarried                  | 116 (80.6)         |
| <b>Total</b>               | 144 (100)          |

265

266

## 267 **Level of knowledge of COVID-19 among Deaf persons**

268 Twelve question items were asked the deaf persons regarding the knowledge of COVID-19  
269 subscale. Responses to the questions items were rated on a numeric scale as I do not know = 0  
270 and Yes = 1. Results showed that majority of the deaf persons were not knowledgeable on 8  
271 questions items. This represented a lack of knowledge of 67% of the items of the knowledge  
272 subscale (Table 2).

273

274 **Table 2: Level of knowledge of COVID-19 among Deaf persons**

| Question items                                                                                             | Response option      | <i>f</i> (%)      |
|------------------------------------------------------------------------------------------------------------|----------------------|-------------------|
| <b>1. COVID-19 is a disease caused by a virus</b>                                                          | <b>I do not know</b> | <b>124 (86.1)</b> |
|                                                                                                            | Yes                  | 20 (13.9)         |
|                                                                                                            | Total                | 144 (100)         |
| <b>2. The virus is an RNA virus</b>                                                                        | <b>I do not know</b> | <b>138 (95.8)</b> |
|                                                                                                            | Yes                  | 6 (4.2)           |
|                                                                                                            | Total                | 144 (100)         |
| <b>3. The virus is called SARS COV-2</b>                                                                   | <b>I do not know</b> | <b>140 (97.2)</b> |
|                                                                                                            | Yes                  | 4 (2.8)           |
|                                                                                                            | Total                | 144 (100)         |
| <b>4. On average, it takes 5 – 14 days when someone is infected with the virus for symptoms to show up</b> | <b>I do not know</b> | <b>130 (90.3)</b> |
|                                                                                                            | Yes                  | 14 (9.7)          |
|                                                                                                            | Total                | 144 (100)         |
| <b>5. COVID-19 is currently being diagnosed using antibodies, proteins and gene detection methods</b>      | <b>I do not know</b> | <b>140 (97.2)</b> |
|                                                                                                            | Yes                  | 4 (2.8)           |
|                                                                                                            | Total                | 144 (100)         |
| <b>6. Current treatment for COVID-19 is symptomatic treatment</b>                                          | <b>I do not know</b> | <b>90 (62.5)</b>  |
|                                                                                                            | Yes                  | 54 (37.5)         |
|                                                                                                            | Total                | 144 (100)         |
| <b>7. To this date, there is no antiviral agent specific to the virus.</b>                                 | <b>I do not know</b> | <b>122 (84.7)</b> |
|                                                                                                            | Yes                  | 22 (15.3)         |
|                                                                                                            | Total                | 144 (100)         |
| <b>8. The virus keeps mutating</b>                                                                         | <b>I do not know</b> | <b>94 (65.3)</b>  |
|                                                                                                            | Yes                  | 50 (34.7)         |
|                                                                                                            | Total                | 144 (100)         |
| <b>9. COVID-19 is spread through droplet transmission</b>                                                  | I do not know        | 46 (31.9)         |
|                                                                                                            | Yes                  | 98 (68.1)         |
|                                                                                                            | Total                | 144 (100)         |
| <b>10. Anyone can get infected with the virus</b>                                                          | I do not know        | 22 (15.3)         |

|                                                                                                                |               |            |
|----------------------------------------------------------------------------------------------------------------|---------------|------------|
|                                                                                                                | Yes           | 122 (84.7) |
|                                                                                                                | Total         | 144 (100)  |
| <b>11. The main clinical symptoms of COVID-19 include fever, dry cough, tiredness, loss of taste and smell</b> | I do not know | 24 (16.7)  |
|                                                                                                                | Yes           | 120 (83.3) |
|                                                                                                                | Total         | 144 (100)  |
| <b>12. Persons with underlying health conditions might suffer serious illness of the disease.</b>              | I do not know | 60 (41.7)  |
|                                                                                                                | Yes           | 84 (58.3)  |
|                                                                                                                | Total         | 144 (100)  |

275

276

## 277 **Attitude of Deaf persons towards COVID-19**

278 Six question items were asked concerning the attitude of deaf persons towards COVID-19

279 subscale. Responses to the questions items were rated on a numeric scale as No = 0, I am not

280 sure = 1 and Yes = 2. Results showed that majority of the deaf persons had good attitude

281 towards COVID-19. Deaf persons showed good attitude in all 6 items of the attitude subscale.

282 As a point worthy of note, all deaf persons said “yes” to getting vaccinated against COVID-19

283 on the day of data collection and any other time and were ready to encourage their family and

284 friends to get vaccinated against COVID-19 (Table 3).

285

286 **Table 3: Attitude of Deaf persons towards COVID-19**

| <b>Question items</b>                                                                       | <b>Response option</b> | <b><i>f</i> (%)</b> |
|---------------------------------------------------------------------------------------------|------------------------|---------------------|
| <b>1. I believe that COVID-19 can be prevented if I adhere to the preventive guidelines</b> | No                     | 4 (2.8)             |
|                                                                                             | I am not sure          | 16 (11.1)           |
|                                                                                             | <b>Yes</b>             | <b>124 (86.1)</b>   |
|                                                                                             | Total                  | 144 (100)           |
| <b>2. I encourage others to adhere to the preventive guidelines</b>                         | No                     | 2 (1.4)             |

|                                                                                     |               |                   |
|-------------------------------------------------------------------------------------|---------------|-------------------|
|                                                                                     | I am not sure | 22 (15.3)         |
|                                                                                     | <b>Yes</b>    | <b>120 (83.3)</b> |
|                                                                                     | Total         | 144 (100)         |
| <b>3. I will go and test for COVID-19 if need be</b>                                | No            | 2 (1.4)           |
|                                                                                     | I am not sure | 46 (31.9)         |
|                                                                                     | <b>Yes</b>    | <b>96 (66.7)</b>  |
|                                                                                     | Total         | 144 (100)         |
| <b>4. I will encourage my family and friends to test for COVID-19</b>               | No            | 2 (1.4)           |
|                                                                                     | I am not sure | 50 (34.7)         |
|                                                                                     | <b>Yes</b>    | <b>92 (63.9)</b>  |
|                                                                                     | Total         | 144 (100)         |
| <b>5. I will go and get vaccinated against COVID-19 today and any other time</b>    | No            | 0                 |
|                                                                                     | I am not sure | 0                 |
|                                                                                     | <b>Yes</b>    | <b>144 (100)</b>  |
|                                                                                     | Total         | 144 (100)         |
| <b>6. I will encourage my family and friends to get vaccinated against COVID-19</b> | No            | 0                 |
|                                                                                     | I am not sure | 0                 |
|                                                                                     | <b>Yes</b>    | <b>144 (100)</b>  |
|                                                                                     | Total         | 144 (100)         |

287

288

## 289 **Adherence to preventive practices of COVID-19 among Deaf** 290 **persons**

291 Nine question items were asked the deaf persons pertaining to their adherence to preventive  
292 practices of COVID-19 subscale. Responses to the questions items were rated on a numeric  
293 scale as Never = 0, Sometimes = 1, Often = 2 and Always = 3. Average score using modal  
294 values were used to represent the aggregate responses of our sample. Results showed that deaf  
295 persons “always” practised 5 items in the adherence to preventive practices subscale and

296 “sometimes” practised 4 items in the subscale. This represented a strict adherence to the  
297 preventive practices of COVID-19 of 56% of the items of the adherence to COVID-19  
298 preventive practices subscale (Table 4).

299

300 **Table 4: Adherence to preventive practices of COVID-19 among Deaf persons**

| Question items                                                                                                                                                                  | Modal score |
|---------------------------------------------------------------------------------------------------------------------------------------------------------------------------------|-------------|
| 1. I wear face protection at all times                                                                                                                                          | 3.00        |
| 2. I avoid physical contact (e.g., handshakes, hugs, etc.) with others as much as possible                                                                                      | 3.00        |
| 3. I choose open, well-ventilated spaces over closed ones                                                                                                                       | 3.00        |
| 4. I wash my hands regularly with soap under running water for at least 30 seconds                                                                                              | 3.00        |
| 5. I clean my hands intermittently with an alcohol-based hand sanitizer                                                                                                         | 3.00        |
| 6. I practice physical distancing (at least 1 meter apart) from others, even if they do not appear sick as much as possible                                                     | 1.00        |
| 7. I practicing good respiratory hygiene by covering my mouth and nose with a cloth when sneezing or coughing or I sneeze or cough in my flexed elbow in the absence of a cloth | 1.00        |
| 8. I avoid touching my eyes, nose and mouth as much as possible                                                                                                                 | 1.00        |
| 9. I stay home or indoors if I am experiencing any of the symptoms and any other symptoms, I am not sure of                                                                     | 1.00        |

301

302

## 303 Discussion

304 Having observed with ardent interest in the scientific literature on the scope of the COVID-19  
305 disease since its inception, specifically on the knowledge, attitude and adherence to the  
306 preventive practices (KAP) of the disease, we noticed few and unmethodical reports on the  
307 KAP of COVID-19 among deaf persons globally. We therefore set forth to contribute to the  
308 scientific literature on the scope of COVID-19 on the KAP of COVID-19 among deaf persons  
309 in Ghana from a sample of deaf persons in the Ayawaso North Municipality.



310 Good attitude and adherence to the preventive practices of COVID-19 was observed among  
311 the deaf persons. However, knowledge about the science of the disease was lacking. The good  
312 attitude and adherence to the preventive practices of COVID-19 observed reflects the mass  
313 public health preventive campaigns to COVID-19 by various stakeholders including the  
314 Ministry of Health (MOH), Ghana Health Service (GHS), Ministry of Information (MOI),  
315 media houses and individuals about the preventive measures of the disease in Ghana. All  
316 campaigns about the disease including the periodic ‘presidential updates on measures taken in  
317 the fight against the pandemic in Ghana’, largely focuses on the preventive practices against  
318 the disease. Besides, the GHS through its Municipal Health Directorates (MHD) routinely  
319 organized targeted public health prevention campaigns against COVID-19 for deaf persons  
320 registered with the municipalities. In these campaigns, deaf persons were constantly updated  
321 on aseptic ways to handle, wear and dispose of their facemasks, the right steps to wash their  
322 hands, the right steps and moments to use hand sanitizers, how to practice physical distancing,  
323 how to practice good respiratory hygiene and to get vaccinated when the vaccines arrive in the  
324 country and they are called upon to get vaccinated.

325 As is the case, targeted special public health education about the COVID-19 vaccination was  
326 done by GHS through its MHDs for all deaf persons registered with the municipalities when  
327 the vaccines were received in the country and it was time to vaccinate the populace. It was  
328 during one of such special interventions for deaf persons, i.e., the nationwide second dose of  
329 COVID-19 vaccination for deaf persons, that this study was conducted. Additionally, very  
330 early in the pandemic, during televised live briefings and recorded sessions about the situation  
331 of the pandemic in the country by the President or the Minister for Information or the Minister  
332 for Health or the Director of the GHS, deaf communities were supported by having sign  
333 language interpreters during these broadcast. These broadcasts also never ended without  
334 reiterating the adherence to the preventive practices against the disease.

335 Regarding the knowledge of the science of COVID-19, the municipal health directorate were  
336 shown the findings of this study. They agreed to it, realizing their primal goal has been on  
337 teaching deaf persons on how to protect themselves from the disease rather than the science of  
338 the disease. Deficient knowledge was found on the causative agent of the disease, the nature  
339 and dynamics of the virus, the name of the virus, the incubation period of the virus and the  
340 detection and diagnostic means of the virus. This is disturbing because these items represent  
341 the basic information about the pandemic. One of the major concerns about the pandemic was  
342 ensuring access to right information about the virus and the disease to all persons. Concerning  
343 deaf persons, many communication gaps sort to be bridged by various advocacy institutions  
344 for deaf persons working in partnership in this period. One of such interventions was the  
345 development of new vocabulary for COVID-19 terminology for deaf persons [22]. This helped  
346 the deaf community and sign language interpreters engaged in various formal and informal  
347 interpretation of COVID-19 related information resources. Yet still, this study shows that gaps  
348 still persist. A relational barrier may be seen here. On the part of the sign language interpreters,  
349 it may be likely that interpreters were not keeping themselves abreast with the international  
350 sign language for COVID-19 or interpreters were unable to break down the scientific  
351 terminologies e.g., SARS COV-2, RNA, droplet infection, underlying health conditions,  
352 antibodies, proteins and gene detection methods, mutation, herd immunity etc. associated with  
353 the disease to the deaf persons. On the part of deaf persons too, it is probable that deaf persons  
354 did not understand or were unfamiliar with the scientific terminologies associated with the  
355 disease. In such situations, interpreters must use a scenario to describe what they are  
356 communicating or finger spell what they are describing to deaf persons. The low level of  
357 education recorded amongst deaf persons could influence their appreciation of these scientific  
358 terms or rather simply, deaf persons were also not keeping themselves informed and updated

359 on the progress of the disease. Apropos, getting knowledge about the disease was passive  
360 among deaf persons.

361 The knowledge of the disease, the attitudes adopted by persons due to the level of knowledge  
362 of the disease and the decision to adhere to the preventive practices (KAP) of the disease is  
363 vital in the control and management of the disease in Ghana and globally.

364

## 365 **Conclusions**

366 The glaring challenges to social inclusion posed by the pandemic was examined in terms of the  
367 KAP of COVID-19 among a deaf community in Ghana. Regarding knowledge of COVID-19,  
368 findings from the study showed that majority of the deaf persons were not knowledgeable on  
369 8 questions items. This represented a lack of knowledge of 67% of the items of the knowledge  
370 subscale. Concerning attitude to COVID-19, findings showed that majority of the deaf persons  
371 had good attitude towards COVID-19. Deaf persons showed good attitude in all 6 items of the  
372 attitude subscale. Pertaining to the adherence to the preventive practices against the disease,  
373 findings showed that deaf persons “always” practised 5 items in the adherence to preventive  
374 practices subscale and “sometimes” practised 4 items in the subscale. This represented a strict  
375 adherence to the preventive practices of COVID-19 of 56% of the items of the adherence to  
376 preventive practices subscale.

377

## 378 **Recommendations**

379 Educational campaigns about COVID-19 should also emphasize the teaching and  
380 understanding of the science of the virus and the disease to its audience. New concepts and  
381 vocabulary especially relating to health concepts and vocabulary should be published far and  
382 wide regularly to keep the deaf community and sign language interpreters updated, to ensure

383 efficient communication. Health institutions should continually employ the services of  
384 qualified sign language interpreters to guarantee the incessant inclusion of deaf persons in  
385 health activities.

386

## 387 **Acknowledgements**

388 We are grateful to the Municipal Health Director, the Municipal Public Health Nurse, the  
389 Municipal Disease Control Officer, the Municipal Health Promotion Officer, the Municipal  
390 Health Information Officer, the Municipal Chief Director, the Municipal Social Welfare  
391 Director and the head of the Ghana National Association of the Deaf representatives of the  
392 Ayawaso North Municipality for allowing us to conduct this important study. We are indebted  
393 to the deaf persons for sharing their time with us.

394

## 395 **References**

- 396 1. World Health Organization [WHO]. Coronavirus disease (COVID-19). Available from  
397 [https://www.who.int/health-topics/coronavirus#tab=tab\\_3](https://www.who.int/health-topics/coronavirus#tab=tab_3).
- 398 2. World Health Organization [WHO]. WHO Director-General's opening remarks at the  
399 media briefing on COVID-19 - 11 March 2020. Available from  
400 <https://www.who.int/director-general/speeches/detail/who-director-general-s-opening-remarks-at-the-media-briefing-on-covid-19---11-march-2020>.
- 401 3. Zhang C, Zheng W, Huang X, Bell EW, Zhou X, & Zhang Y. Protein Structure and  
402 Sequence Reanalysis of 2019-nCoV Genome Refutes Snakes as Its Intermediate Host  
403 and the Unique Similarity between Its Spike Protein Insertions and HIV-1. *J. Proteome*  
404 *Res.* 2020;19, 1351–1360. doi: 10.1021/acs.jproteome.0c00129.
- 405

- 406 4. Zhou P, Yang XL, Wang XG, Hu B, Zhang L, Zhang W, et al. A pneumonia outbreak  
407 associated with a new coronavirus of probable bat origin. *Nature*. 2020;579, 270–273.  
408 doi: 10.1038/s41586-020-2012-7.
- 409 5. Liu Y, Mao B, Liang S, Yang JW, Lu HW, Chai YH, et al. Association between age  
410 and clinical characteristics and outcomes of COVID-19. *Eur. Respirat. J.* 2020;55,  
411 2001112. doi: 10.1183/13993003.01112-2020.
- 412 6. Xiao K, Zhai J, Feng Y, Zhou N, Zhang X, Zou JJ, et al. Isolation of SARS-CoV-2-  
413 related coronavirus from Malayan pangolins. *Nature*. 2020;583, 286–289. doi:  
414 10.1038/s41586-020-2313-x.
- 415 7. Brian DA, & Baric RS. Coronavirus genome structure and replication. *Curr. Topics*  
416 *Microbiol. Immunol.* 2005;287, 1–30. doi: 10.1007/3-540-26765-4\_1.
- 417 8. Jin Y, Yang H, Ji W, Wu W, Chen S, Zhang W, Duan G. Virology, Epidemiology,  
418 Pathogenesis, and Control of COVID-19. *Viruses*. 2020;12.
- 419 9. Hu B, Guo H, Zhou P, & Shi ZL. Characteristics of SARS-CoV-2 and COVID-19. *Nat.*  
420 *Rev. Microbiol.* 2020. doi: 10.1038/s41579-020-00459-7.
- 421 10. Chan JF, Yuan S, Kok KH, To KK, Chu H, Yang J, et al. A familial cluster of  
422 pneumonia associated with the 2019 novel coronavirus indicating person-to-person  
423 transmission: a study of a family cluster. *Lancet (London England)*. 2020;395, 514–  
424 523. doi: 10.1016/s0140-6736(20)30154-9.
- 425 11. Deng SQ, & Peng HJ. Characteristics of and Public Health Responses to the  
426 Coronavirus Disease 2019 Outbreak in China. *J. Clin. Med.* 2020;9, 575. doi:  
427 10.3390/jcm9020575.
- 428 12. Wu Z, & McGoogan JM. Characteristics of and Important Lessons from the  
429 Coronavirus Disease 2019 (COVID-19) Outbreak in China: Summary of a Report of

- 430 72 314 Cases from the Chinese Center for Disease Control and Prevention. *Jama*.  
431 2020;323, 1239–1242. doi: 10.1001/jama.2020.2648.
- 432 13. Huang C, Wang Y, Li X, Ren L, Zhao J, Hu Y, et al. Clinical features of patients  
433 infected with 2019 novel coronavirus in Wuhan, China. *Lancet (London England)*.  
434 2020;395, 497–506. doi: 10.1016/s0140-6736(20)30183-5.
- 435 14. Haimei MA. Pathogenesis and Treatment Strategies of COVID-19-Related  
436 Hypercoagulant and Thrombotic Complications. *Clin. Appl. Thrombosis/Hemostasis*  
437 *Off. J. Int. Acad. Clin. Appl. Thrombosis/Hemostasis*. 2020;26:1076029620944497.  
438 doi: 10.1177/1076029620944497.
- 439 15. Lee IC, Huo TII, & Huang YH. Gastrointestinal and liver manifestations in patients  
440 with COVID-19. *J. Chin. Med. Assoc. JCMA*. 2020;83, 521–523. doi:  
441 10.1097/jcma.0000000000000319.
- 442 16. World Health Organization [WHO]. Coronavirus disease (COVID-19) advice for the  
443 public: Mythbusters. Available from [https://www.who.int/emergencies/diseases/novel-](https://www.who.int/emergencies/diseases/novel-coronavirus-2019/advice-for-public/myth-busters?gclid=CjwKCAjw0a-SBhBkEiwApljU0tp14t4OJlx5MK1cJcDyVYXHwmOsIm5lURa3D2OjPGbA865EAkl_gxoCs_IQAvD_BwE#virus)  
444 [coronavirus-2019/advice-for-public/myth-busters?gclid=CjwKCAjw0a-](https://www.who.int/emergencies/diseases/novel-coronavirus-2019/advice-for-public/myth-busters?gclid=CjwKCAjw0a-SBhBkEiwApljU0tp14t4OJlx5MK1cJcDyVYXHwmOsIm5lURa3D2OjPGbA865EAkl_gxoCs_IQAvD_BwE#virus)  
445 [SBhBkEiwApljU0tp14t4OJlx5MK1cJcDyVYXHwmOsIm5lURa3D2OjPGbA865EA](https://www.who.int/emergencies/diseases/novel-coronavirus-2019/advice-for-public/myth-busters?gclid=CjwKCAjw0a-SBhBkEiwApljU0tp14t4OJlx5MK1cJcDyVYXHwmOsIm5lURa3D2OjPGbA865EAkl_gxoCs_IQAvD_BwE#virus)  
446 [kl\\_gxoCs\\_IQAvD\\_BwE#virus](https://www.who.int/emergencies/diseases/novel-coronavirus-2019/advice-for-public/myth-busters?gclid=CjwKCAjw0a-SBhBkEiwApljU0tp14t4OJlx5MK1cJcDyVYXHwmOsIm5lURa3D2OjPGbA865EAkl_gxoCs_IQAvD_BwE#virus).
- 447 17. Wang MY, Zhao R, Gao LJ, Gao XF, Wang DP & Cao JM. SARS-CoV-2: Structure,  
448 Biology, and Structure-Based Therapeutics Development. *Front. Cell. Infect.*  
449 *Microbiol*. 2020;10:587269. doi: 10.3389/fcimb.2020.587269.
- 450 18. Hossain MF, Hasana S, Al Mamun A, Uddin MS, Wahed MII, Sarker S, et al. COVID-  
451 19 Outbreak: Pathogenesis, Current Therapies, and Potentials for Future Management.  
452 *Front. Pharmacol*. 2020;11, 563478.
- 453 19. Kaliyaperumal K. Guideline for conducting a knowledge, attitude and practice (KAP)  
454 study. *A ECS Illumination*, 2004;4:7-9.

- 455 20. Lavrakas PJ. *Census*. In: Encyclopedia of Survey Research Methods. 2008. DOI:  
456 <https://dx.doi.org/10.4135/9781412963947.n61>.
- 457 21. Park DI. Development and Validation of a Knowledge, Attitudes and Practices  
458 Questionnaire on COVID-19 (KAP COVID-19). *Int. J. Environ. Res. Public Health*.  
459 2021;18,7493. <https://doi.org/10.3390/ijerph18147493>.
- 460 22. Irish Deaf Society [IDS]. Resources. Available from  
461 <https://www.irishdeafsociety.ie/resources/>.
